# Supplementary material for: The prognostic role of early tumor shrinkage in patients with hepatocellular carcinoma undergoing immunotherapy
Source: Springer Nature journal article supplement (doi:10.1186/s40644-022-00487-x), 2022-09-24

**Supplementary Figure S3:**

Patient example for early tumor shrinkage.

In this patient who had undergone tumor ablation previously one abdominal lymph node metastasis (TL 1) was detected in follow-up with a diameter of 36 mm. After initiation of systemic treatment with immunotherapy (nivolumab), the lymph node metastasis shrank to 14 mm (ETS 61.1%, PR).

Baseline

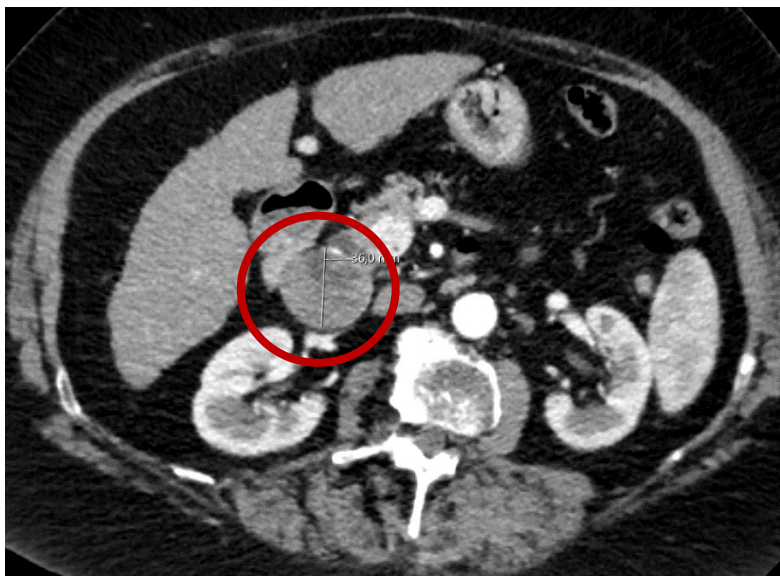

Follow-up

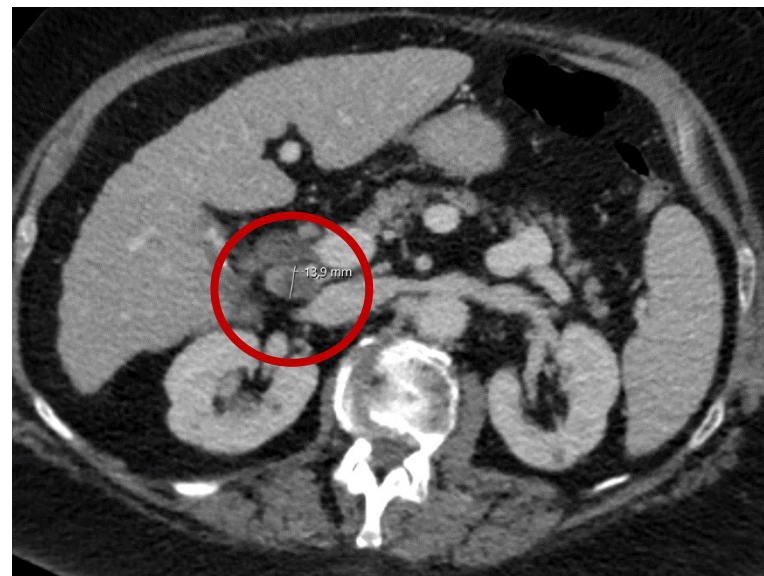

Supplement: MOESM3 [file 25789488]
