# Supplementary material for: The prognostic role of early tumor shrinkage in patients with hepatocellular carcinoma undergoing immunotherapy
Source: Springer Nature journal article supplement (doi:10.1186/s40644-022-00487-x), 2022-09-24

**Supplementary Figure S4:**

Kaplan-Meier curves show overall survival of patients treated with immunotherapy for hepatocellular cancer, stratified according to the amount of early tumor shrinkage (ETS) with the alternative cut-off 20%

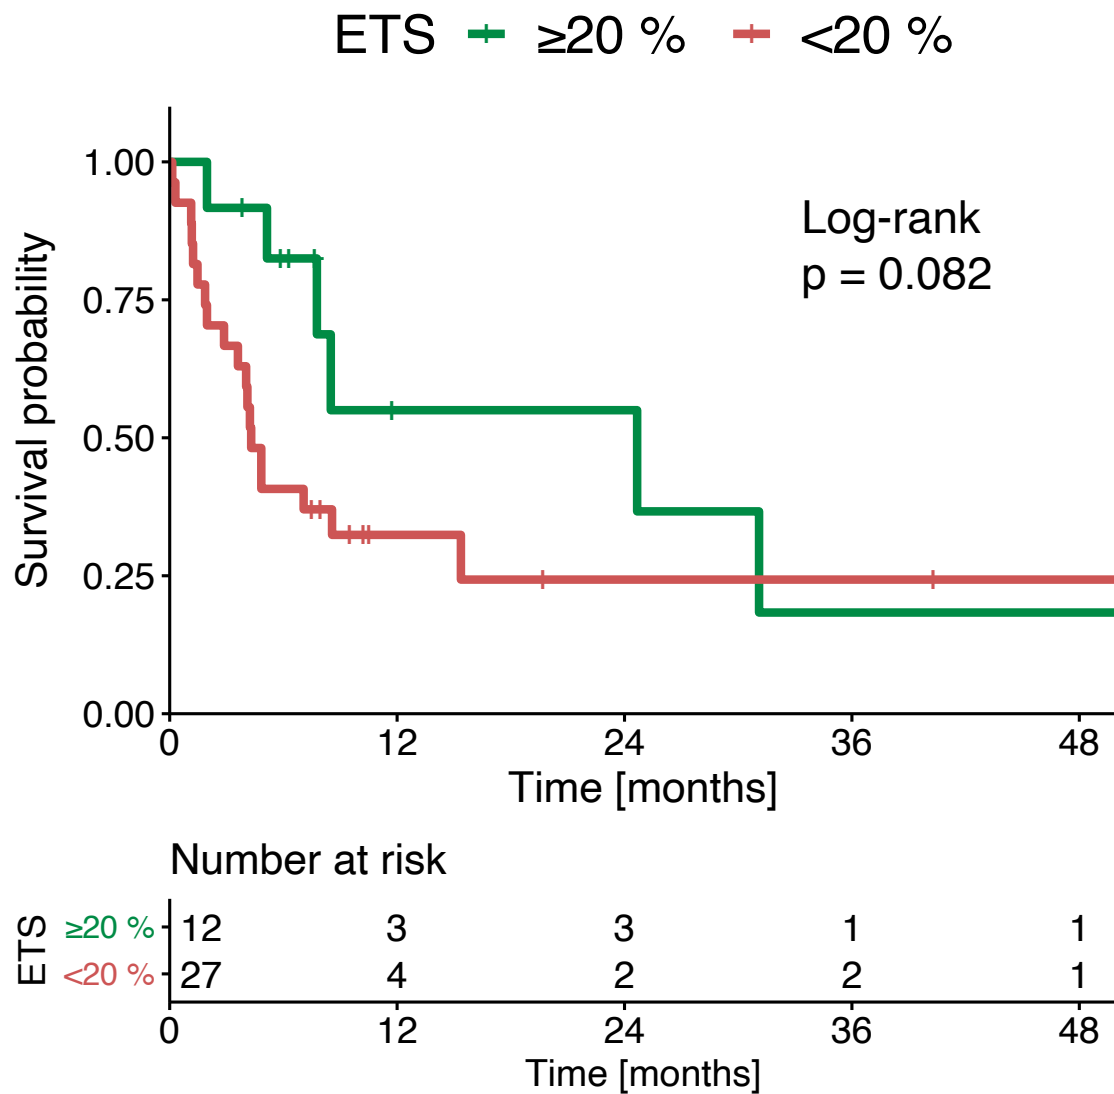

Supplement: MOESM4 [file 25789488]
